1 **Vertically transmitted rhabdoviruses are found across three insect families and**  
2 **have dynamic interactions with their hosts**

3

4 Ben Longdon<sup>1a\*</sup>, Jonathan P Day<sup>1</sup>, Nora Schulz<sup>1,2</sup>, Philip T Leftwich<sup>3</sup>, Maaïke A de Jong<sup>4</sup>,  
5 Casper J Breuker<sup>5</sup>, Melanie Gibbs<sup>6</sup>, Darren J Obbard<sup>7</sup>, Lena Wilfert<sup>8</sup>, Sophia CL Smith<sup>1</sup>,  
6 John E McGonigle<sup>1</sup>, Thomas M Houslay<sup>8</sup>, Lucy I Wright<sup>8,9</sup>, Luca Livraghi<sup>5</sup>, Luke C Evans<sup>5</sup>,  
7 <sup>10</sup>, Lucy A Friend<sup>3</sup>, Tracey Chapman<sup>3</sup>, John Vontas<sup>11,12</sup>, Natasa Kambouraki<sup>11,12</sup>, Francis M  
8 Jiggins<sup>1</sup>

9

10

11 <sup>1</sup> Department of Genetics, University of Cambridge, Cambridge, CB2 3EH, UK

12

13 <sup>2</sup> Institute for Evolution and Biodiversity, University of Münster, Münster, Germany

14

15 <sup>3</sup> School of Biological Sciences, University of East Anglia, Norwich Research Park,  
16 Norwich, NR4 7TJ, UK

17

18 <sup>4</sup> School of Biological Sciences, Bristol Life Sciences Building, University of Bristol, 24  
19 Tyndall Avenue, Bristol, BS8 1TQ, UK

20

21 <sup>5</sup> Evolutionary Developmental Biology Research Group, Department of Biological and  
22 Medical Sciences, Faculty of Health and Life Sciences, Oxford Brookes University, Gypsy  
23 Lane, Headington, Oxford, OX3 0BP, UK

24

25 <sup>6</sup> NERC Centre for Ecology and Hydrology, Maclean Building, Crowmarsh Gifford,  
26 Wallingford, Oxfordshire, OX10 8BB, UK

27

28 <sup>7</sup> Institute of Evolutionary Biology, University of Edinburgh, Ashworth Laboratories,  
29 Charlotte Auerbach Road, Edinburgh, EH9 3FL, UK

30

31 <sup>8</sup> Centre for Ecology & Conservation, Biosciences, College of Life & Environmental  
32 Sciences, University of Exeter, Penryn Campus, TR10 9FE, UK

33

34 <sup>9</sup> Zoological Society of London, Regent's Park, London, NW1 4RY, UK

35

36 <sup>10</sup> Ecology and Evolutionary Biology Research Division, School of Biological Sciences,  
37 University of Reading, Whiteknights, Reading, RG6 6AS, UK

38

39 <sup>11</sup> Lab Pesticide Science, Agricultural University of Athens, Iera Odos 75, 11855, Athens,  
40 Greece

41

42 <sup>12</sup> Molecular Entomology, Institute Molecular Biology and Biotechnology / Foundation  
43 for Research and Technology, Voutes, 70013, Heraklio, Crete, Greece

44

45 \* Corresponding author: [b.longdon2@exeter.ac.uk](mailto:b.longdon2@exeter.ac.uk)

46 <sup>a</sup> Current address: Centre for Ecology & Conservation, Biosciences, College of Life &  
47 Environmental Sciences, University of Exeter, Penryn Campus, TR10 9FE, UK

48 Running title: Vertically transmitted rhabdoviruses

49

## 50 **Abstract**

51

52 A small number of free-living viruses have been found to be obligately vertically  
53 transmitted, but it remains uncertain how widespread vertically transmitted viruses are  
54 and how quickly they can spread through host populations. Recent metagenomic studies  
55 have found several insects to be infected with sigma viruses (*Rhabdoviridae*). Here, we  
56 report that sigma viruses that infect Mediterranean fruit flies (*Ceratitis capitata*),  
57 *Drosophila immigrans*, and speckled wood butterflies (*Pararge aegeria*) are all vertically  
58 transmitted. We find patterns of vertical transmission that are consistent with those  
59 seen in *Drosophila* sigma viruses, with high rates of maternal transmission, and lower  
60 rates of paternal transmission. This mode of transmission allows them to spread rapidly  
61 in populations, and using viral sequence data we found the viruses in *D. immigrans* and  
62 *C. capitata* had both recently swept through host populations. The viruses were common  
63 in nature, with mean prevalences of 12% in *C. capitata*, 38% in *D. immigrans* and 74% in  
64 *P. aegeria*. We conclude that vertically transmitted rhabdoviruses may be widespread in  
65 insects, and that these viruses can have dynamic interactions with their hosts.

66

## 67 **Introduction**

68

69 Insects are host to a range of vertically transmitted parasites [1, 2]. Vertical  
70 transmission is normally associated with maternally transmitted bacterial  
71 endosymbionts, and with transposable elements that can proliferate within the host  
72 genome and spread through populations [3, 4]. Many free-living viruses are also capable  
73 of vertical transmission without integrating into the host genome [5]. In most cases this  
74 is combined with horizontal transmission [6], but in a few cases the virus has become  
75 obligately vertically transmitted [2, 7].

76

77 A well characterised obligately vertically transmitted virus that does not integrate into  
78 its host's genome is the sigma virus of *Drosophila melanogaster* (DMelSV) [8]. This is a  
79 negative sense RNA virus in the family *Rhabdoviridae* that is found in the cytoplasm of  
80 cells [9]. Typically, vertically-transmitted cytoplasmic pathogens can only be  
81 transmitted maternally, and this alone cannot allow them to increase in prevalence [10].  
82 However, DMelSV is transmitted by both infected males and females, which allows it to  
83 spread through host populations, even if it carries a cost to the host [2, 9, 11-13]. This is  
84 analogous to the spread of transposable elements through a host population, where the  
85 element can spread at rates greater than a Mendelian locus, giving it a natural  
86 transmission advantage. Two more vertically transmitted sigma viruses have been  
87 characterised in different species of *Drosophila* (DAffSV and DObsSV from *Drosophila*  
88 *affinis* and *Drosophila obscura* respectively). Like DMelSV, these are biparentally  
89 transmitted through both the eggs and sperm of their hosts [14, 15]. Females transmit  
90 the virus at a high rate (typically close to 100%), whereas males transmit the virus at a  
91 lower rate, probably because sperm transmit a lower amount of virus to the developing  
92 embryo [9, 15].

93

94 A consequence of biparental transmission is that, like transposable elements, sigma  
95 viruses can rapidly spread through host populations [3, 4, 16]. For example, a genotype  
96 of DMelSV that was able to overcome a host resistance gene called *ref(2)P* swept across  
97 Europe in the 1980-1990s [17-20]. Similarly, DObsSV has swept through populations of  
98 *D. obscura* in the last decade [15].

99  
100 It is unknown whether obligately vertically transmitted viruses are common in nature  
101 or are just a quirk of a few species of *Drosophila*. Recent metagenomic sequencing has  
102 found rhabdoviruses associated with a wide diversity of insects and other arthropods,  
103 including numerous viruses closely related to the three vertically transmitted sigma  
104 viruses described in *Drosophila* [21, 22]. This raises the prospect that vertically  
105 transmitted rhabdoviruses could be common insect pathogens. Here, we examine three  
106 recently identified viruses that fall into the sigma virus clade and infect Mediterranean  
107 fruit flies (medflies; *Ceratitis capitata*, Diptera, Tephritidae), *Drosophila immigrans*  
108 (Diptera, Drosophilidae, sub-genus *Drosophila*) and speckled wood butterflies (*Pararge*  
109 *aegeria*, Lepidoptera, Nymphalidae). We go on to test whether these viruses are  
110 vertically transmitted and investigate whether they show evidence of the rapid  
111 dynamics seen in other sigma viruses.

112

## 113 **Methods**

114

### 115 **Transmission**

116

117 We determined the patterns of transmission of *Ceratitis capitata sigmavirus* (CCapSV),  
118 *Drosophila immigrans sigmavirus* (DImmSV) and *Pararge aegeria rhabdovirus* (PAegRV),  
119 which all fall into the sigma virus clade [21]. We carried out crosses between infected  
120 and uninfected males and females, and measured the rates of transmission to their  
121 offspring.

122

123 Infected *C. capitata* were collected from the Cepa Petapa lab stock and uninfected flies  
124 were from the TOLIMAN lab stock. Virgin females and males were crossed and their  
125 offspring collected. Only 29% of flies from the Cepa Petapa stock were infected when we  
126 carried out the crosses (see below). In total we tested 10 crosses between infected  
127 females and uninfected males, 8 crosses with uninfected females and infected males, and  
128 7 crosses where neither sex was infected. We tested both parents and a mean of 6  
129 offspring for each cross (range 4-8, total of 197 offspring) for infection using RT-PCR  
130 (see table S1).

131

132 Infected *D. immigrans* were collected from a DImmSV infected isofemale line (EGL 154)  
133 and uninfected flies were collected from a stock established from four isofemale lines  
134 (all lines originated from Cambridge UK). Virgin females and males were crossed and  
135 their offspring collected. In total we tested 20 crosses between infected females and  
136 uninfected males, 18 crosses with uninfected females and infected males, and 8 crosses  
137 where neither sex was infected. We tested both parents and a mean of 4 offspring for  
138 each cross (range= 2-4, total of 178 offspring) for infection using RT-PCR (see table S1).

139

140 To measure transmission of PAegSV in speckled wood butterflies, we examined crosses  
141 between the offspring of wild caught *P. aegeria* females that were an unknown mix of  
142 infected and uninfected individuals. The wild caught females were collected in Corsica  
143 and Sardinia in May 2014 (see below). Virgin females and males were crossed, and their  
144 offspring collected. We tested the infection status of the parents used for the crosses  
145 *post hoc* using RT-PCR; in total there were 10 crosses between infected females and  
146 uninfected males, 8 crosses with uninfected females and infected males and 1 cross  
147 where neither sex was infected (data not shown from 28 crosses where both parents  
148 were infected). We tested a mean of 4 offspring for each cross (range 1-8, total of 171  
149 offspring) for virus infection using RT-PCR (see table S1).

150

### 151 **Collections to examine virus prevalence in wild populations**

152

153 *C. capitata* were collected (as eclosing flies) from fallen argan fruit in Arzou, Ait Melloul,  
154 Morocco in July 2014 (latitude, longitude: 30.350, -9.473) and from peaches and figs  
155 from Timpaki, Crete from July-September 2015 (35.102, 24.756).

156

157 *D. immigrans* were collected from August-October 2012 from the following locations:  
158 Kent (51.099, 0.164 and 51.096, 0.173); Edinburgh (55.928, -3.169 and 55.925, -3.192);  
159 Falmouth (50.158, -5.076 and 50.170, -5.107); Coventry (52.386, -1.482; 2.410, -1.468;  
160 52.386, -1.483 and 52.408, -1.582); Cambridge (52.221, 0.042); Derbyshire (52.978, -  
161 1.439 and 52.903, -1.374); Les Gorges du Chambon, France (45.662, 0.555) and Porto,  
162 Portugal (41.050, -8.645).

163

164 *P. aegeria* were collected from several UK locations in August and September 2014:  
165 South Cambridgeshire (52.116, 0.252); Yorkshire (53.657, -1.471); Oxfordshire (51.833,  
166 -1.026); North Cambridgeshire (52.395, -0.237); Dorset (50.999, -2.257) and Somerset  
167 (51.363, -2.525). We also sequenced one infected *P. aegeria* individual from each of the  
168 families used for the crosses described above. These individuals were collected in May  
169 2014 from Corsica (41.752, 9.191; 41.759, 9.184; 41.810, 9.246; 41.377, 9.179; 41.407,  
170 9.171; 41.862, 9.379; 42.443, 9.011 and 42.516, 9.174) and Sardinia (39.964, 9.139;  
171 39.945, 9.199; 41.233, 9.408; 40.911, 9.095 and 40.037, 9.256).

172

### 173 **Virus detection and sequencing**

174

175 Individual insects were homogenised in Trizol reagent (Invitrogen) and RNA extracted  
176 by chloroform phase separation, followed by reverse transcription with random-  
177 hexamers using GoScript reverse transcriptase (Promega). For each sample we carried  
178 out PCRs to amplify partial nucleocapsid (N) and RNA Dependant RNA Polymerase (L)  
179 gene sequences from the respective viral genomes (see table S1), as well as a control  
180 gene from the insect genome (*COI* or *RpL32*) to confirm the extraction was successful.  
181 For CCapSV and PAegRV we sequenced all infected samples (19 and 130 respectively),  
182 for DImmSV we sequenced a subset of 87 samples from across all populations. PCR  
183 products were treated with Antarctic Phosphatase and Exonuclease I (New England  
184 Biolabs) and directly sequenced using BigDye on a Sanger ABI capillary sequencer  
185 (Source Bioscience, Cambridge, UK). Data were trimmed in Sequencher (v4.5) and  
186 aligned using ClustalW in Bioedit software. All polymorphic sites were examined by eye.

187 Recombination is typically absent or rare in negative sense RNA viruses [23]; we were  
188 unable to detect any evidence of recombination in our data using GARD [24] with a  
189 general time reversible model and gamma-distributed rate variation with four  
190 categories. Median joining phylogenetic networks were produced using PopArt (v1.7  
191 <http://popart.otago.ac.nz>). Population genetic analysis was carried out in DNAsp  
192 (v5.10.01). *P* values for estimates of Tajima's *D* were estimated using DNAsp; across all  
193 sites *P* values were calculated using coalescent simulations assuming no recombination,  
194 for synonymous sites they were estimated using a beta distribution. Maps used for the  
195 figures were from QGIS (v2.14) [25].

196

### 197 **ADAR edits**

198

199 We observed some of the DImmSV sequences had a cluster of mutations in the N gene  
200 consistent with those caused by adenosine deaminases that act on RNAs (ADARs).  
201 ADARs target double stranded RNA and convert adenosine (A) to inosine (I), and display  
202 a 5' neighbour preference (A=U>C>G) [26, 27]. During viral genome replication I's are  
203 paired with guanosine (G), so editing events appear as changes from A to G when  
204 sequenced. Sigma viruses have been found to show mutations characteristic of ADAR  
205 editing, with single editing events causing clusters of mutations [28, 29].

206

207 As ADAR-induced hyper-mutations will be a source of non-independent mutation we  
208 aimed to exclude such mutations to prevent them confounding our analyses. Compared  
209 to a 50% majority-rule consensus sequence of our DImmSV sequences, we identified 17  
210 sites with A to G mutations at ADAR preferred sites across the negative sense genome  
211 and its positive sense replication intermediate. This is a significant over-representation  
212 when compared to ADAR non-preferred sites (Fisher's exact test  $P=0.037$ ). We therefore  
213 excluded all ADAR preferred sites from our dataset and carried out our population  
214 genetics analysis on this data. For CCapSV and PAegRV sequences we did not detect an  
215 overrepresentation of A to G mutations at ADAR preferred sites, suggesting these  
216 viruses did not contain ADAR hyper-mutations. The R [30] script used to identify ADAR  
217 edits and exclude preferential ADAR editing sites is available in a data repository  
218 (<https://dx.doi.org/10.6084/m9.figshare.3438557.v1>).

219

### 220 **Reconstructing viral population history**

221

222 To reconstruct how long ago these viruses shared a common ancestor and how their  
223 population size has changed over time we used a Bayesian phylogenetic inference  
224 package (BEAST v1.8.0) [31]. The evolutionary rate of viruses was assumed to be the  
225 same as in DMelSV [32]. This is similar to other related rhabdoviruses [33, 34] and  
226 evolutionary rates of DMelSV do not differ significantly between the lab and field [35].  
227 To account for uncertainty in this evolutionary rate estimate, we approximated its  
228 distribution with a normal distribution (mean= $9.9 \times 10^{-5}$  substitutions/site/year,  
229 standard deviation= $3.6 \times 10^{-5}$  substitutions/site/year), and this distribution was used as  
230 a fully-informative prior to infer dates of the most recent common ancestor of each  
231 virus. The model assumed a strict molecular clock model and an HKY85 substitution  
232 model [36]. Sites were partitioned into two categories by codon position (1+2, 3), and  
233 separate evolutionary rates were estimated for each category. Such codon partition

234 models have been shown to perform as well as more complex non-codon partitioned  
235 models but with fewer parameters [37]. We tested whether a strict clock rate can be  
236 excluded by running models with a lognormal relaxed clock; for all three viruses we  
237 found the posterior estimate of the coefficient of variation statistic abuts the zero  
238 boundary, and so a strict clock cannot be excluded [38].

239  
240 We reconstructed the phylogeny with an exponentially expanding population  
241 (parameterised in terms of growth rate) or a constant population size model. The  
242 population doubling time was calculated from the growth rate as  $\ln(2)/\text{growth rate}$ . We  
243 excluded a constant population size if the 95% confidence intervals (CIs) for estimates  
244 of growth rate did not cross zero. We verified we were using the most suitable  
245 demographic model for each virus using the path sampling maximum likelihood  
246 estimator implemented in BEAST (see supplementary materials) [39]. We note that  
247 estimates of the root age were similar across models (Table S2).

248  
249 Each model was run for 1 billion MCMC steps with sampling every one hundred  
250 thousand generations for each model, and a 10% burnin was used for all parameter  
251 estimates, selected after examining trace files by eye. Posterior distributions and model  
252 convergence was examined using Tracer (v1.6) [40] to ensure an adequate number of  
253 independent samples. The 95% CI was taken as the region with the 95% highest  
254 posterior density.

255

## 256 **Results**

257

### 258 **Sigma viruses in speckled wood butterflies, medflies and *Drosophila immigrans*** 259 **are vertically transmitted**

260

261 The sigma virus of *D. melanogaster* is a vertically transmitted through both eggs and  
262 sperm. In a recent metagenomics analysis we identified sigma viruses in a range of other  
263 insect species [21]. Here, we report that three of these viruses are also vertically  
264 transmitted, with large sex-differences in transmission rates. In all three species the  
265 infected females transmitted the virus to the majority of their offspring (Figure 1; mean  
266 proportion offspring infected: CCapSV=0.82, DImmSV=1, PAegRV=0.88). Paternal  
267 transmission rates were much lower (Figure 1). Infected male *C. capitata* did not  
268 transmit CCapSV to any of their offspring. Infected male *D. immigrans* transmitted  
269 DImmSV to their offspring, but at lower rate (0.51) than through females (Wilcoxon  
270 exact rank test:  $W=20$ ,  $P<0.001$ ). Similarly, infected male *P. aegeria* also transmitted  
271 PAegRV to their offspring, but at lower rate (0.51) than maternal transmission  
272 (Wilcoxon rank sum test  $W=17$ ,  $P=0.026$ ). There was no difference in the proportion of  
273 infected sons and daughters for all three viruses (Wilcoxon exact rank test: CCapSV  
274  $W=316$ ,  $P=1$ ; DImmSV  $W=1106$ ,  $P=0.538$ , PAegRV  $W=782$ ,  $P=0.853$ ).

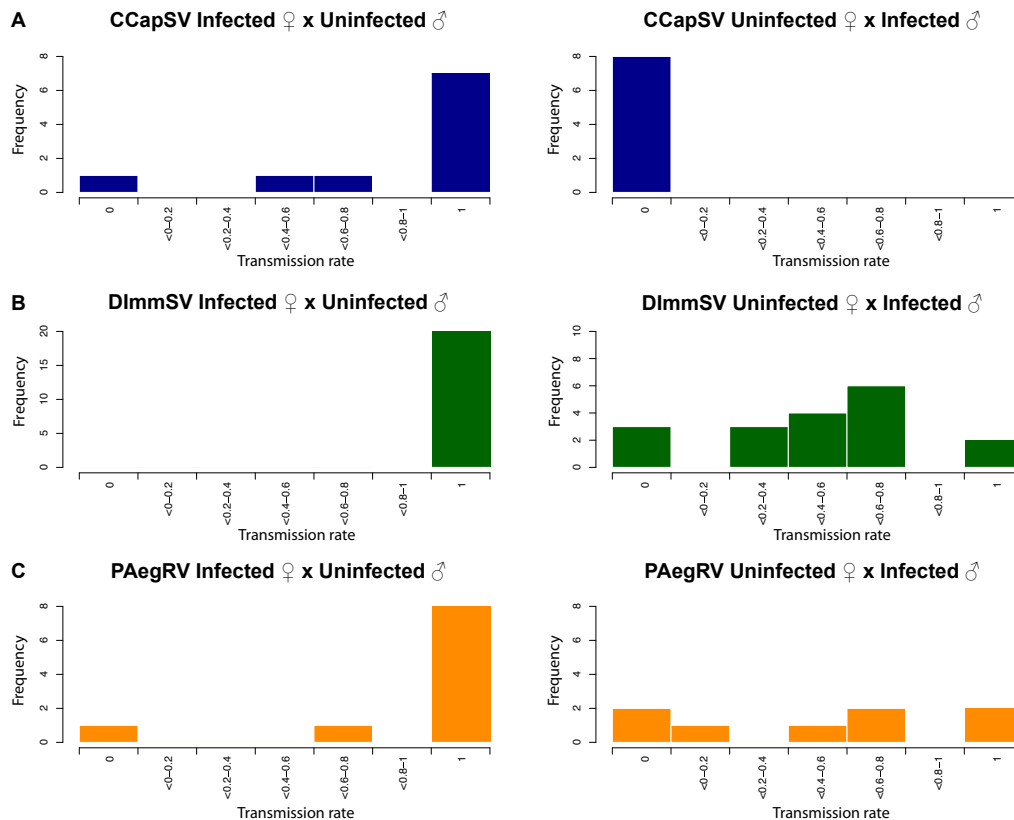

275  
276  
277

278 **Figure 1. Vertical transmission rates of three sigma viruses from infected females**  
279 **(left) and males (right).** A= CCapSV, B= DImmSV, C= PAegRV. The far left and far right  
280 bins are individuals with zero or 100% transmission respectively. Results from control  
281 crosses where both parents were uninfected are not shown.

282

283 For CCapSV and DImmSV horizontal or sexual transmission appears to be rare or absent.  
284 We did not detect virus in any of the offspring from crosses where both parents were  
285 uninfected, or in uninfected individuals that mated with infected individuals during the  
286 crosses. As the infection status of parents in crosses to measure transmission of PAegRV  
287 was only established *post hoc*, we were unable to test for evidence of horizontal or  
288 sexual transmission between parents.

289

290 **Sigma viruses are common in natural populations**

291

292 We tested 243 *C. capitata*, 527 *D. immigrans* and 137 *P. aegeria* from the wild for  
293 presence of their respective viruses using RT-PCR. We found the mean viral prevalence  
294 across populations was 12% for CCapSV, 38% for DImmSV and 74% for PAegRV. There  
295 were significant differences in the prevalence between populations (tables S4-S6) for  
296 CCapSV (Figure 2; Chi-Sq test,  $df = 1$ ,  $\chi^2 = 13.08$ ,  $P < 0.001$ ) and DImmSV (Figure 2; Chi-  
297 Sq test,  $df = 7$ ,  $\chi^2 = 40.648$ ,  $P < 0.001$ ), but not for PAegRV (Figure 2; Chi-Sq test,  $df = 72$ ,  $\chi^2 =$   
298  $81.333$ ,  $P = 0.211$ ).

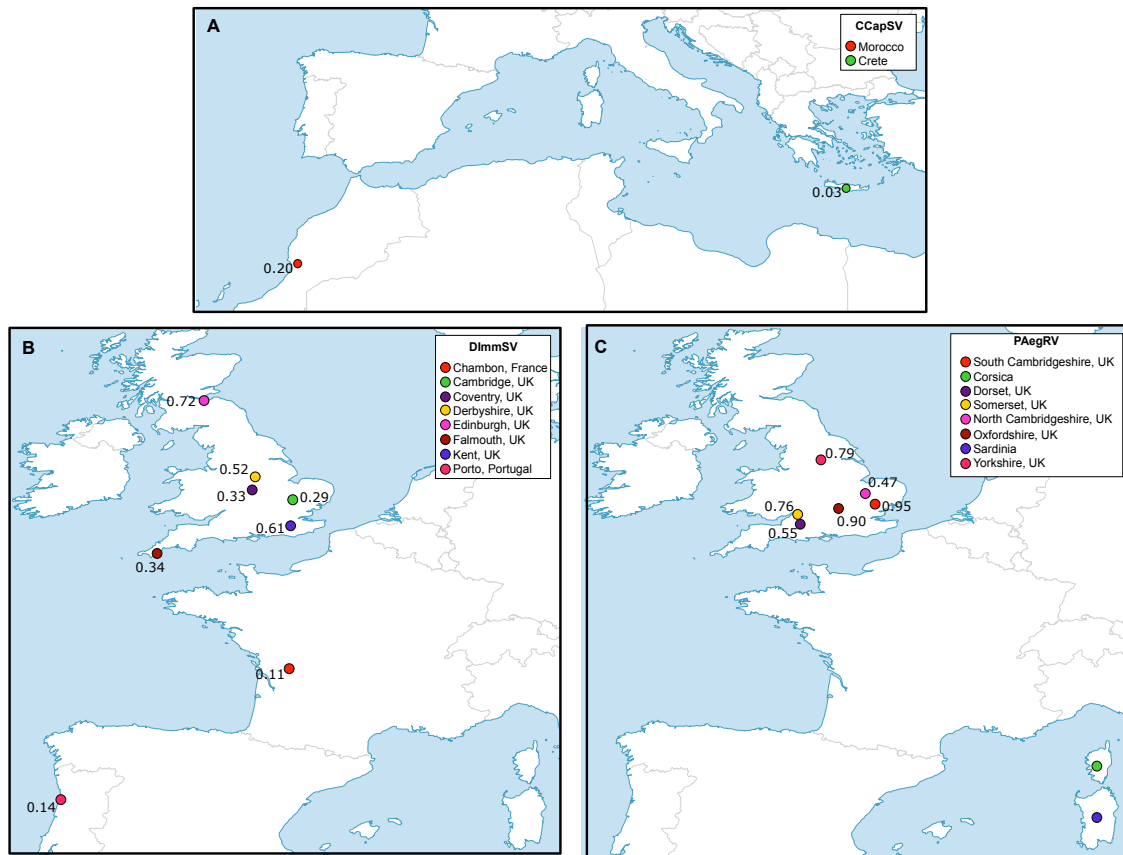

299

300

301 **Figure 2. Viral prevalence at different locations.** A= CapSV; B= DImmSV and C=

302 PAegRV. Prevalence data was not available for PAegRV collected in Corsica and Sardinia.

303

304

305

306

307

308

309

310

311

312

313

314

315

316

317

318

319

320

321

322

323

### Sigma viruses can rapidly spread through populations

To infer the past dynamics of these viruses, we sequenced part of the N and L genes from multiple viral isolates. We used these sequence data to produce a median joining phylogenetic network for each of the three viruses (Figure 3), and examined the population genetics of these virus populations.

DImmSV had the lowest genetic diversity of the three viruses, and appears to have very recently swept through host populations. We found only 40 polymorphic sites out of 929 sites examined (16 in N and 24 in L gene) over 87 viral sequences. The average number of pairwise differences per site ( $\pi$ ) was 0.20% across all sites. This low genetic diversity appears to have been caused by the virus recently sweeping through host populations, with the DImmSV sequences forming a star shaped network as is expected following a recent sweep (Figure 3). Due to the low levels of population structure and small sample sizes from individual populations (see below), we combined sequences from across populations to investigate the past demography of the virus. Overall there was a large excess of rare variants compared to that expected under the neutral model, which is indicative of an expanding population or selective sweep (Tajima's  $D = -2.45$ ,  $P < 0.001$ ). Out of 40 segregating sites, 27 are singletons. This result held even if only synonymous sites were analysed (Tajima's  $D = -2.27$   $P < 0.01$ ), indicating that it is not likely to be caused by slightly deleterious amino acid polymorphisms being kept at low



324 frequency by purifying selection. Furthermore, these results are unlikely to be  
325 confounded by population structure, as when we analysed only the samples from  
326 Derbyshire (the population with the largest sample size,  $n=41$ ) we found Tajima's  $D$  was  
327 significant for all sites ( $D= -1.68 P=0.026$ ). Tajima's  $D$  was negative but not significant  
328 for synonymous sites (synonymous:  $D=-1.11 P>0.1$ ), probably because there were only  
329 six synonymous polymorphisms in this population.

330  
331 To reconstruct past changes in the effective size of the DImmSV population we used a  
332 Bayesian approach based on the coalescent process in the BEAST software [31, 41]. The  
333 posterior distribution for the estimated growth rate did not overlap zero (95% CI = 0.12,  
334 0.99) suggesting the population had expanded, and the exponential growth model was  
335 also preferred in the path sampling analysis (see table S3). Assuming the evolutionary  
336 rate is the same as the related *D. melanogaster* virus DMelSV, we estimated the viral  
337 population size has doubled every 1.5 years (95% CI= 0.7-5.7), with the viruses in our  
338 sample sharing a common ancestor 16 years ago (95% CI= 5-31 years).

339  
340 CCapSV had higher genetic diversity, likely reflecting a somewhat older infection than  
341 DImmSV. Combining sequences across populations, the genetic diversity was  
342 approximately five times greater than DImmSV ( $\pi = 0.99\%$  across all sites) and we  
343 found 44 segregating sites over 1278 sites (21 in N gene and 23 in L gene) in 19 viral  
344 sequences. As CCapSV showed high levels of genetic population structure (see results  
345 below), we restricted our analyses of demography to viruses from Morocco (the  
346 population with the greatest number of samples,  $n=13$ ). For these viruses we found a  
347 significant excess of rare variants at all sites (Tajima's  $D= -1.67 P=0.035$ ) and for  
348 synonymous sites (Tajima's  $D=-1.81 P<0.05$ ). This suggests the Moroccan population of  
349 CCapSV has been expanding or undergone a recent selective sweep. The coalescent  
350 analysis supported the hypothesis that the CCapSV population had expanded (95% CI of  
351 the exponential growth parameter = 0.031, 0.343) and the exponential growth model  
352 was preferred in the path sampling analysis (see table S3). We estimated the effective  
353 population size has doubled every 3.9 years (95% CI= 2.0-22.7 years), with the  
354 Moroccan viruses sharing a common ancestor 45 years ago (95% CI=16-85 years)  
355 suggesting this is a more ancient expansion, with a greater number of mutations  
356 accumulating since the lineages separated. Combining the samples from the two  
357 populations, the most recent common ancestor of all CCapSV isolates was estimated to  
358 be 51 years ago (95% CI=18-96 years) with an exponential growth model, assuming the  
359 evolutionary rate is the same as DMelSV.

360  
361 PAegRV was inferred to be the oldest of the three infections. The genetic diversity of this  
362 virus was over 11 times that of DImmSV ( $\pi$ : 2.22% across all sites), and we found 204  
363 segregating sites over 1281 sites (83 in N gene 121 in L gene) in 130 viral sequences. As  
364 PAegRV showed high levels of genetic population structure (see results below), we  
365 restricted our analyses of demography to viruses from Hildersham (the population with  
366 the largest sample size,  $n=36$ ). There was no evidence of a population expansion in  
367 viruses from Hildersham, as there was not an excess of rare variants for all sites  
368 (Tajima's  $D= -0.58, P=0.322$ ) or synonymous sites (Tajima's  $D= -0.65, P>0.1$ ).  
369 Furthermore, we could reject a model of exponential growth in BEAST, as the 95% CI of  
370 the growth rate overlapped zero (95% CI= -0.008, 0.028), and the constant population

371 size model was preferred in the path sampling analysis (see table S3). The BEAST  
372 analysis supported the conclusion that this was an older infection, with the common  
373 ancestor of all of our viral isolates existing 309 years ago (95% CI=105-588 years),  
374 assuming the evolutionary rate is the same as DMelSV.  
375

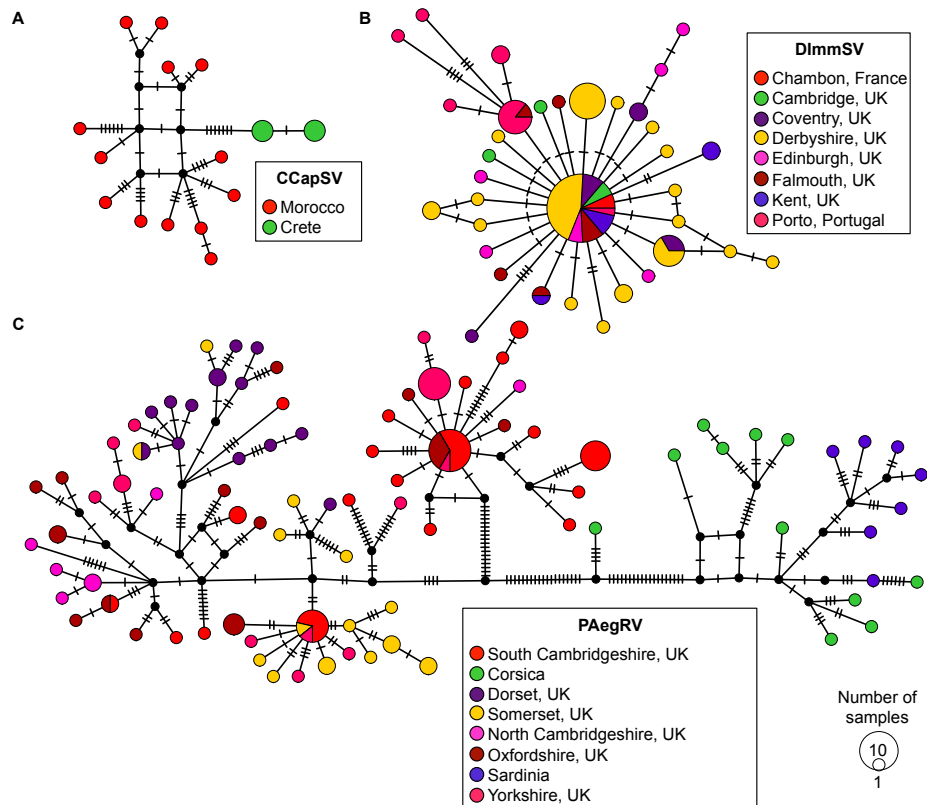

376  
377  
378 **Figure 3: Median joining phylogenetic network of sequences from the three**  
379 **viruses.** The colours represent the different locations samples were collected from, the  
380 size of the node represents the number of samples with that sequence and the dashes on  
381 branches show the number of mutations between nodes. A= 19 CCapSV sequences, B=  
382 87 DImmSV sequences, C= 130 PAegRV sequences. Phylogenetic trees of each of the  
383 viruses are also available (<https://dx.doi.org/10.6084/m9.figshare.3437723.v1>).  
384

### 385 **Sigma viruses have genetically structured populations**

386  
387 The virus populations were all geographically genetically structured, with the oldest  
388 infections (see above) showing the greatest levels of structure. Using partial sequences  
389 of the N and L genes, we quantified genetic structure by calculating an analogue of  $F_{ST}$   
390 ( $K_{ST}$ ) that measures the proportion of the genetic variation contained in subpopulations  
391 relative to the population as a whole [42]. The eight PAegSV populations showed high  
392 levels of genetic differentiation (Figure 3), with  $K_{ST}$  values of 0.48 (permutation test,  
393  $P < 0.001$ ). Even when the divergent Corsican and Sardinian populations were excluded  
394 we still found significant genetic differentiation ( $K_{ST} = 0.24$ , permutation test,  $P < 0.001$ ).  
395 The two CCapSV populations fell into monophyletic clades, and this was reflected in  
396 intermediate levels of genetic differentiation (Figure 3) with  $K_{ST} = 0.37$  (permutation

397 test,  $P < 0.001$ ). Finally, DImmSV showed lower levels of genetic differentiation with a  $K_{ST}$   
398 value of 0.15 (permutation test,  $P < 0.001$ ).

399

## 400 Discussion

401

402 Free-living viruses that are obligately vertically transmitted have only been reported  
403 from a small number of insect species. However, recent metagenomic studies have  
404 found that sigma viruses related to a vertically transmitted pathogen of *Drosophila*  
405 *melanogaster* are widespread in insects. Here we have sampled three of these viruses  
406 from different insect families (Lepidoptera, and Diperta in the Tephritidae and  
407 Drosophilidae), and found that they are all vertically transmitted. Therefore, most sigma  
408 viruses are likely vertically transmitted, and may represent a major group of insect  
409 pathogens.

410

411 The patterns of vertical transmission that we observed for three sigma viruses from *C.*  
412 *capitata*, *D. immigrans* and *P. aegeria* are consistent with the mode of vertical  
413 transmission seen in other sigma viruses [9, 15]. In two of the viruses we studied —  
414 PAegRV and DImmSV — we found transmission through both eggs and sperm, but  
415 higher transmission rates through eggs. However, we only observed maternal  
416 transmission of CCapSV. Paternal transmission may also occur in CCapSV but we simply  
417 failed to detect it in this experiment, as in other sigma viruses some infected males are  
418 unable to transmit the virus if the line is “unstabilised” [9, 15]. This is commonly seen in  
419 insect lines with low infection rates (only 29% of flies carried CCapSV in our infected  
420 line) and appears to be due to males that are infected from their father receiving only a  
421 low dose of virus that fails to infect the male germ-line [9, 15].

422

423 Our population genetic data shows this mode of transmission can allow rapid sweeps of  
424 these viruses through host populations. Many cytoplasmic bacteria are also vertically  
425 transmitted in insects, and these are almost exclusively only transmitted by infected  
426 females. This has led these endosymbionts to evolve different strategies to ensure their  
427 persistence, such as distorting the host sex ratio and causing cytoplasmic  
428 incompatibility [10]. Biparental transmission is an alternate strategy that can allow  
429 sigma viruses to rapidly invade host populations [32, 43]. Here, we have shown DImmSV  
430 and CCapSV sequences both show evidence of recent sweeps (~15 and 50 years ago  
431 respectively). Of the two sigma viruses studied previously (DMelSV from *D.*  
432 *melanogaster* and DObsSV in *D. obscura*) both showed evidence of a recent sweep [15,  
433 32, 35]. The spread of DImmSV and CCapSV has occurred in the last few decades, with  
434 the viral populations doubling in just a few years. Therefore, sigma viruses seem to have  
435 very dynamic associations with host populations. This reflects the pattern seen in other  
436 vertically transmitted parasites. For example P-elements invaded populations of *D.*  
437 *melanogaster* worldwide in the twentieth century and are currently spreading through  
438 *D. simulans* populations [3, 16]. Likewise, vertically transmitted bacterial  
439 endosymbionts have frequently been found to have recently swept through new species  
440 or populations [44-47].

441

442 Why do sigma viruses have such dynamic interactions with their hosts? In the case of  
443 DMelSV this was thought to be a selective sweep of viral genotypes able to overcome a

444 host resistance gene called *ref(2)P* [19, 20, 48]. DMelSV genotypes that could overcome  
445 the *ref(2)P* resistance allele rapidly increased in frequency between the early 1980s and  
446 early 1990s in French and German populations [18, 49]. In a recombining population a  
447 selective sweep would only reduce diversity surrounding the site under selection, but as  
448 these viruses do not recombine the entire genome is affected by a selective sweep. For  
449 DImmSV, CCapSV and DObsSV we are therefore unable to distinguish between a long-  
450 term host-virus association overlain by a recent selective sweep of an advantageous  
451 mutation, or the recent acquisition and spread of novel viruses through previously  
452 uninfected host populations. To separate these hypotheses, we would need to discover  
453 either closely related viruses in other species or populations, or the remnants of more  
454 diverse viral populations that existed prior to a selective sweep.

455

## 456 **Conclusions**

457

458 Our results suggest that vertically transmitted rhabdoviruses may be widespread in a  
459 broad range of insect taxa. It remains to be seen whether this mode of vertical  
460 transmission is a unique trait of sigma-like rhabdoviruses, or whether this is the case for  
461 the numerous rhabdoviruses from other clades that infect insects [21, 22]. Sigma viruses  
462 commonly have dynamic interactions with their hosts, with vertical transmission  
463 though both eggs and sperm enabling them to rapidly spread through host populations.

464

465

## 466 **Author contributions**

467

468 Conceived and designed study: BL. Carried out field collections: BL, SCLS, DJO, JEM, LIW,  
469 MDJ, CJB, MG, TMH, PL, JV, NK. Carried out crosses to measure transmission: PL, TC, LAF,  
470 CJB, MG, LL, LCE, SCLS, JPD, BL. Carried out molecular work: NS, JPD, SCLS, BL. Provided  
471 resources/samples for project: all authors. Analysed data: BL and FMJ. Wrote  
472 manuscript: BL and FMJ with comments from all other authors.

473

## 474 **Funding**

475

476 BL is supported by a Sir Henry Dale Fellowship jointly funded by the Wellcome Trust  
477 and the Royal Society (Grant Number 109356/Z/15/Z). BL and FMJ are supported by a  
478 NERC grant (NE/L004232/1 <http://www.nerc.ac.uk/>) and by an ERC grant (281668,  
479 *Drosophila*Infection, <http://erc.europa.eu/>). PTL, TC and LAF are supported by a BBSRC  
480 grant (BB/K000489/1).

481

## 482 **Competing interests**

483

484 We have no competing interests

485

## 486 **Data availability**

487

488 Sequences are deposited in Genbank under the following accessions: KX352837-  
489 KX353310

490 Additional data are available on Figshare:

491 Sequence alignments (<https://dx.doi.org/10.6084/m9.figshare.3409420.v1>)

492 ADAR R script (<https://dx.doi.org/10.6084/m9.figshare.3438557.v1>)

493 Phylogenetic trees (<https://dx.doi.org/10.6084/m9.figshare.3437723.v1>)

494 Transmission data (<https://dx.doi.org/10.6084/m9.figshare.4133469.v1>)

495

## 496 Acknowledgements

497 Thanks to Roger Vila, Leonardo Dapporto, Vlad Dinca and Raluca Voda who collected the  
498 Sardinian and Corsican *P. aegeria* to set-up the lab stocks used for crosses.

499

## 500 References

501

502 1. Duron O., Bouchon D., Boutin S., Bellamy L., Zhou L.Q., Engelstadter J., Hurst G.D.  
503 2008 The diversity of reproductive parasites among arthropods: Wolbachia do not walk  
504 alone. *BMC Biology* **6**(27). (doi:Artn 27

505 Doi 10.1186/1741-7007-6-27).

506 2. Longdon B., Jiggins F.M. 2012 Vertically transmitted viral endosymbionts of  
507 insects: do sigma viruses walk alone? *Proceedings of the Royal Society B* **279**(1744),  
508 3889-3898. (doi:10.1098/rspb.2012.1208).

509 3. Kofler R., Hill T., Nolte V., Betancourt A.J., Schlotterer C. 2015 The recent invasion  
510 of natural *Drosophila simulans* populations by the P-element. *Proceedings of the*  
511 *National Academy of Sciences of the United States of America* **112**(21), 6659-6663.  
512 (doi:10.1073/pnas.1500758112).

513 4. Anxolabehere D., Kidwell M.G., Periquet G. 1988 Molecular characteristics of  
514 diverse populations are consistent with the hypothesis of a recent invasion of  
515 *Drosophila melanogaster* by mobile P elements. *Molecular Biology and Evolution* **5**(3),  
516 252-269.

517 5. Mims C.A. 1981 Vertical Transmission of Viruses. *Microbiological Reviews* **45**(2),  
518 267-286.

519 6. Xu P.J., Liu Y.Q., Graham R.I., Wilson K., Wu K.M. 2014 Densovirus Is a Mutualistic  
520 Symbiont of a Global Crop Pest (*Helicoverpa armigera*) and Protects against a  
521 Baculovirus and Bt Biopesticide. *PLoS Pathogens* **10**(10). (doi:ARTN e1004490  
522 10.1371/journal.ppat.1004490).

523 7. Martinez J., Lepetit D., Ravallec M., Fleury F., Varaldi J. 2016 Additional heritable  
524 virus in the parasitic wasp *Leptopilina boulardi*: prevalence, transmission and  
525 phenotypic effects. *J Gen Virol* **97**(2), 523-535. (doi:10.1099/jgv.0.000360).

526 8. L'Heritier P.H., Teissier G. 1937 Une anomalie physiologique héréditaire chez la  
527 *Drosophile*. *CR Acad Sci Paris* **231**, 192-194.

528 9. L'Heritier P. 1957 The hereditary virus of *Drosophila*. *Advances in Virus Research*  
529 **5**, 195-245.

530 10. Engelstadter J., Hurst G.D.D. 2009 The Ecology and Evolution of Microbes that  
531 Manipulate Host Reproduction. *Annual Review of Ecology Evolution and Systematics* **40**,  
532 127-149. (doi:10.1146/annurev.ecolsys.110308.120206).

533 11. Yampolsky L.Y., Webb C.T., Shabalina S.A., Kondrashov A.S. 1999 Rapid  
534 accumulation of a vertically transmitted parasite triggered by relaxation of natural  
535 selection among hosts. *Evol Ecol Res* **1**(5), 581-589.

536 12. Wilfert L., Jiggins F.M. 2013 The dynamics of reciprocal selective sweeps of host  
537 resistance and a parasite counter-adaptation in *Drosophila*. *Evolution* **67**(3), 761-773.  
538 (doi:10.1111/j.1558-5646.2012.01832.x).

539 13. Longdon B., Wilfert L., Jiggins F.M. 2012 *The Sigma Viruses of Drosophila*, Caister  
540 Academic Press.

- 541 14. Longdon B., Obbard D.J., Jiggins F.M. 2010 Sigma viruses from three species of  
542 *Drosophila* form a major new clade in the rhabdovirus phylogeny. *Proceedings of the*  
543 *Royal Society B* **277**, 35-44. (doi:10.1098/rspb.2009.1472).
- 544 15. Longdon B., Wilfert L., Obbard D.J., Jiggins F.M. 2011 Rhabdoviruses in two  
545 species of *Drosophila*: vertical transmission and a recent sweep. *Genetics* **188**(1), 141-  
546 150. (doi:10.1534/genetics.111.127696 ).
- 547 16. Kidwell M.G. 1983 Evolution of hybrid dysgenesis determinants in *Drosophila*  
548 *melanogaster*. *Proc Natl Acad Sci U S A* **80**(6), 1655-1659.
- 549 17. Fleuriot A., Periquet G., Anxolabehere D. 1990 Evolution of Natural-Populations  
550 in the *Drosophila-Melanogaster* Sigma Virus System .1. Languedoc (Southern France).  
551 *Genetica* **81**(1), 21-31.
- 552 18. Fleuriot A., Sperlich D. 1992 Evolution of the *Drosophila-Melanogaster-Sigma*  
553 *Virus* System in a Natural-Population from Tubingen. *Theoretical and Applied Genetics*  
554 **85**(2-3), 186-189.
- 555 19. Bangham J., Obbard D.J., Kim K.W., Haddrill P.R., Jiggins F.M. 2007 The age and  
556 evolution of an antiviral resistance mutation in *Drosophila melanogaster*. *Proceedings of*  
557 *the Royal Society B-Biological Sciences* **274**(1621), 2027-2034.
- 558 20. Wayne M.L., Contamine D., Kreitman M. 1996 Molecular population genetics of  
559 ref(2)P, a locus which confers viral resistance in *Drosophila*. *Molecular Biology and*  
560 *Evolution* **13**(1), 191-199.
- 561 21. Longdon B., Murray G.G., Palmer W.J., Day J.P., Parker D.J., Welch J.J., Obbard D.J.,  
562 Jiggins F.M. 2015 The evolution, diversity, and host associations of rhabdoviruses. *Virus*  
563 *Evolution* **1**(1), vev014.
- 564 22. Li C.X., Shi M., Tian J.H., Lin X.D., Kang Y.J., Chen L.J., Qin X.C., Xu J., Holmes E.C.,  
565 Zhang Y.Z. 2015 Unprecedented genomic diversity of RNA viruses in arthropods reveals  
566 the ancestry of negative-sense RNA viruses. *eLife* **4**. (doi:10.7554/eLife.05378).
- 567 23. Chare E.R., Gould, E.A., and Holmes, E.C. 2003 Phylogenetic analysis reveals a low  
568 rate of homologous recombination in negative-sense RNA viruses. *Journal of General*  
569 *Virology* **84**, 2961-2703.
- 570 24. Kosakovsky Pond S.L., Posada D., Gravenor M.B., Woelk C.H., Frost S.D. 2006  
571 GARD: a genetic algorithm for recombination detection. *Bioinformatics* **22**(24), 3096-  
572 3098. (doi:10.1093/bioinformatics/btl474).
- 573 25. Quantum G. 2013 Development Team, 2012. Quantum GIS geographic  
574 information system. Open source geospatial foundation project. *Free Software*  
575 *Foundation, India*.
- 576 26. Bass B.L., Weintraub H. 1988 An Unwinding Activity That Covalently Modifies Its  
577 Double-Stranded-Rna Substrate. *Cell* **55**(6), 1089-1098. (doi:Doi 10.1016/0092-  
578 8674(88)90253-X).
- 579 27. Keegan L.P., Gallo A., O'Connell M.A. 2001 The many roles of an RNA editor.  
580 *Nature Reviews Genetics* **2**(11), 869-878. (doi:Doi 10.1038/35098584).
- 581 28. Carpenter J.A., Keegan L.P., Wilfert L., O'Connell M.A., Jiggins F.M. 2009 Evidence  
582 for ADAR-induced hypermutation of the *Drosophila* sigma virus (Rhabdoviridae). *BMC*  
583 *Genetics* **10**, 75. (doi:1471-2156-10-75 [pii]  
584 10.1186/1471-2156-10-75).
- 585 29. Piontkivska H., Matos L.F., Paul S., Scharfenberg B., Farmerie W.G., Miyamoto  
586 M.M., Wayne M.L. 2016 Role of host-driven mutagenesis in determining genome  
587 evolution of sigma virus (DMelSV; Rhabdoviridae) in *Drosophila melanogaster*. *Genome*  
588 *Biology and Evolution*, evw212.
- 589 30. Team R.D.C. 2006 R: a language and environment for statistical computing. V 2.4.
- 590 31. Drummond A.J., Rambaut A. 2007 BEAST: Bayesian evolutionary analysis by  
591 sampling trees. *BMC Evolutionary Biology* **7**, 214. (doi:Artn 214  
592 Doi 10.1186/1471-2148-7-214).

- 593 32. Wilfert L., Jiggins F.M. 2014 Flies on the move: an inherited virus mirrors  
594 *Drosophila melanogaster's* elusive ecology and demography. *Molecular Ecology* **23**(8),  
595 2093-2104. (doi:10.1111/mec.12709).
- 596 33. Sanjuan R., Nebot M.R., Chirico N., Mansky L.M., Belshaw R. 2010 Viral mutation  
597 rates. *J Virol* **84**(19), 9733-9748. (doi:JVI.00694-10 [pii]  
598 10.1128/JVI.00694-10).
- 599 34. Furio V., Moya A., Sanjuan R. 2005 The cost of replication fidelity in an RNA  
600 virus. *Proceedings of the National Academy of Sciences of the United States of America*  
601 **102**(29), 10233-10237.
- 602 35. Carpenter J.A., Obbard D.J., Maside X., Jiggins F.M. 2007 The recent spread of a  
603 vertically transmitted virus through populations of *Drosophila melanogaster*. *Molecular*  
604 *Ecology* **16**(18), 3947-3954.
- 605 36. Hasegawa M., Kishino H., Yano T.A. 1985 Dating of the human ape splitting by a  
606 molecular clock of mitochondrial DNA. *J Mol Evol* **22**(2), 160-174.
- 607 37. Shapiro B., Rambaut A., Drummond A.J. 2006 Choosing appropriate substitution  
608 models for the phylogenetic analysis of protein-coding sequences. *Molecular Biology and*  
609 *Evolution* **23**(1), 7-9. (doi:msj021 [pii]  
610 10.1093/molbev/msj021).
- 611 38. Gray R.R., Parker J., Lemey P., Salemi M., Katzourakis A., Pybus O.G. 2011 The  
612 mode and tempo of hepatitis C virus evolution within and among hosts. *BMC*  
613 *Evolutionary Biology* **11**. (doi:Artn 131  
614 10.1186/1471-2148-11-131).
- 615 39. Baele G., Lemey P., Bedford T., Rambaut A., Suchard M.A., Alekseyenko A.V. 2012  
616 Improving the Accuracy of Demographic and Molecular Clock Model Comparison While  
617 Accommodating Phylogenetic Uncertainty. *Molecular Biology and Evolution* **29**(9), 2157-  
618 2167. (doi:10.1093/molbev/mss084).
- 619 40. Rambaut A., Drummond A.J. 2007. *Tracer v1.6*, Available from  
620 <http://beastbioedacuk/Tracer>
- 621 41. Drummond A.J., Suchard M.A., Xie D., Rambaut A. 2012 Bayesian phylogenetics  
622 with BEAUti and the BEAST 1.7. *Molecular Biology and Evolution* **29**(8), 1969-1973.  
623 (doi:10.1093/molbev/mss075).
- 624 42. Hudson R.R., Boos D.D., Kaplan N.L. 1992 A Statistical Test for Detecting  
625 Geographic Subdivision. *Molecular Biology and Evolution* **9**(1), 138-151.
- 626 43. Fine P.E. 1975 Vectors and vertical transmission: an epidemiologic perspective.  
627 *Ann N Y Acad Sci* **266**, 173-194.
- 628 44. Turelli M., Hoffmann A.A. 1991 Rapid Spread of an Inherited Incompatibility  
629 Factor in California *Drosophila*. *Nature* **353**(6343), 440-442.
- 630 45. Turelli M., Hoffmann A.A. 1995 Cytoplasmic Incompatibility in *Drosophila*-  
631 *Simulans* - Dynamics and Parameter Estimates from Natural-Populations. *Genetics*  
632 **140**(4), 1319-1338.
- 633 46. Hornett E.A., Charlat S., Wedell N., Jiggins C.D., Hurst G.D. 2009 Rapidly shifting  
634 sex ratio across a species range. *Curr Biol* **19**(19), 1628-1631.  
635 (doi:10.1016/j.cub.2009.07.071).
- 636 47. Jiggins F.M. 2003 Male-killing *Wolbachia* and mitochondrial DNA: selective  
637 sweeps, hybrid introgression and parasite population dynamics. *Genetics* **164**(1), 5-12.
- 638 48. Contamine D. 1981 Role of the *Drosophila*-Genome in Sigma Virus Multiplication  
639 .1. Role of the Ref(2) Gene - Selection of Host-Adapted Mutants at the Nonpermissive  
640 Allele Pp. *Virology* **114**(2), 474-488.
- 641 49. Fleuriot A., Periquet G. 1993 Evolution of the *Drosophila-Melanogaster* Sigma  
642 Virus System in Natural-Populations from Languedoc (Southern France). *Archives of*  
643 *Virology* **129**(1-4), 131-143.

644  
645  
646

## Figure Legends

647 **Figure 1. Vertical transmission rates of three sigma viruses from infected females**  
648 **(left) and males (right).** A= CCapSV, B= DImmSV, C= PAegRV. The far left and far right  
649 bins are individuals with zero or 100% transmission respectively. Results from control  
650 crosses where both parents were uninfected are not shown.

651  
652 **Figure 2. Viral prevalence at different locations.** A= CapSV; B= DImmSV and C=  
653 PAegRV. Prevalence data was not available for PAegRV collected in Corsica and Sardinia.

654  
655 **Figure 3: Median joining phylogenetic network of sequences from the three**  
656 **viruses.** The colours represent the different locations samples were collected from, the  
657 size of the node represents the number of samples with that sequence and the dashes on  
658 branches show the number of mutations between nodes. A= 19 CCapSV sequences, B=  
659 87 DImmSV sequences, C= 130 PAegRV sequences. Phylogenetic trees of each of the  
660 viruses are also available (<https://dx.doi.org/10.6084/m9.figshare.3437723.v1>).  
661
